# Supplementary material for: The reactivity of 1,1-dichloro-2,2-di-tert-butyldiphosphane towards lithiated metal carbonyls: a new entry to phosphanylphosphinidene dimers
Source: Royal Society of Chemistry journal article supplement (doi:10.1039/c5dt04983k), 2016-01-01
Supplement: c5dt04983k1.pdf [file c5dt04983k1.pdf]

The reactivity of 1,1-dichloro-2,2-di-*tert*-butyldiphosphane towards lithiated metal carbonyls. The new entry to phosphanylphosphinidene dimers.

Rafał Grubba\*, Mateusz Zauliczny, Łukasz Ponikiewski and Jerzy Pikies

*Chemical Faculty, Department of Inorganic Chemistry, Gdansk University of Technology,  
G. Narutowicza St. 11/12. PL-80-233 Gdansk (Poland)*

## Supporting information

\*To whom correspondence should be addressed: Email: [grubba@pg.gda.pl](mailto:grubba@pg.gda.pl)

### **This pdf file includes:**

1. Materials and methods
2. Experimental details and spectroscopic data.
3. Crystallographic details.
4. DFT calculation details.
5. References.

## 1. Materials and methods

THF was dried over K/benzophenone and distilled under argon. Pentane was dried over Na/benzophenone/diglyme and distilled under argon. All manipulations were performed in flame-dried Schlenk-type glassware on a vacuum line. Solution  $^{31}\text{P}$ ,  $^{13}\text{C}$ , and  $^1\text{H}$  spectra were recorded on Bruker AV300 MHz, Bruker AV400 MHz, BrukerAV600 MHz and Varian 500 MHz spectrometers (external standard TMS for  $^1\text{H}$ ,  $^{13}\text{C}$ ; 85%  $\text{H}_3\text{PO}_4$  for  $^{31}\text{P}$ ) at ambient temperature. A literature methods were used to prepare  $[\text{Cp}^*\text{M}(\text{CO})_3]\text{Li}$  (M= Mo or W)<sup>1</sup> and  $t\text{-Bu}_2\text{P-PCl}_2$ .<sup>2</sup>

## 2. Experimental details and spectroscopic data

### 2.1 Reaction of $[\text{Cp}^*\text{Mo}(\text{CO})_3]\text{Li}$ with $t\text{-Bu}_2\text{P-PCl}_2$ (mol ratio 1:1). Synthesis of $[\text{Cp}^*\text{Mo}(\text{CO})_3\{\eta^2\text{-}t\text{-Bu}_2\text{P-P}(\text{Cl})\}]$ (**1-Mo**).

10 mL of solution of  $[\text{Cp}^*\text{Mo}(\text{CO})_3]\text{Li}$  (c= 0,1 M; 1 mmol) in THF was added dropwise to 10 mL of solution of  $t\text{-Bu}_2\text{P-PCl}_2$  (c= 0,1 M, 1 mmol) in pentane at  $-70\text{ }^\circ\text{C}$ . During the reaction, the color of the solution changed from dark brown to red. The solution was then warmed up to room temperature. The volume was reduced to one half under reduced pressure and the resulting solution was analyzed by  $^{31}\text{P}\{^1\text{H}\}$ ,  $^{31}\text{P}$ , and  $^1\text{H}$  NMR. **1-Mo** was identified in solution. The solvent was then evaporated under reduced pressure and the residue extracted with 10 mL of pentane. The extract was filtrated, reduced to one half under reduced pressure. Then the solution was held at  $-30\text{ }^\circ\text{C}$  and small amount of orange crystals of **2-Mo** deposited within few days. The examination of the  $^{31}\text{P}\{^1\text{H}\}$ -NMR of the reaction mixture indicates **1-Mo**,  $t\text{-Bu}_2\text{PH}$ ,  $t\text{-Bu}_2\text{PCl}$ .

**1-Mo**:  $^{31}\text{P}\{^1\text{H}\}$ :  $\delta$  133.2 (d,  $^1J_{\text{PP}} = 579\text{ Hz}$ ,  $\text{PCl}$ ); 63.8 (d,  $^1J_{\text{PP}} = 579\text{ Hz}$ ,  $t\text{-Bu}_2\text{P}$ );

### 2.2 Reaction of $[\text{Cp}^*\text{Mo}(\text{CO})_3]\text{Li}$ with $t\text{-Bu}_2\text{P-PCl}_2$ (molar ratio 2:1). Synthesis of $[\text{Cp}^*\text{Mo}(\text{CO})_2\{\eta^2\text{-}t\text{-Bu}_2\text{P-P}\}]_2$ (**2-Mo**).

20 mL of solution of  $[\text{Cp}^*\text{Mo}(\text{CO})_3]\text{Li}$  (c= 0,1 M; 2 mmol) in THF was added dropwise to 10 mL of solution of  $t\text{-Bu}_2\text{P-PCl}_2$  (c= 0,1 M, 1 mmol) in pentane at  $-70\text{ }^\circ\text{C}$ . During the reaction, the color of the solution changed from dark brown to red. The solution was then warmed up to room temperature. The volume was reduced to one half under reduced pressure and the resulting solution was analyzed by  $^{31}\text{P}\{^1\text{H}\}$ ,  $^{31}\text{P}$ , and  $^1\text{H}$  NMR. The solvent was then evaporated under reduced pressure and the residue extracted with 10 mL of pentane. The extract was filtrated, reduced to one half under reduced pressure and stored at room temperature. The dark precipitate of **3-Mo** formed after few days. Then the solution filtered and was held at  $-30\text{ }^\circ$ . Orange crystals of **2-Mo**· $0,5\text{C}_5\text{H}_{12}$  deposited within 24 h (190 mg, yield 41%). Elemental analysis: found %, C = 52.73, H = 7.28, calc. % for  $\text{C}_{40}\text{H}_{66}\text{Mo}_2\text{O}_4\text{P}_4,0,5(\text{C}_5\text{H}_{12})$ , C = 53.02, H = 7.54.

**2-Mo**:  $^{31}\text{P}\{^1\text{H}\}$  (AA'XX' spin system):  $\delta$  79.8 (A, *t*-Bu<sub>2</sub>P); -139.5 (X, P);  $^1J_{\text{AX}} = 558$ ,  $^2J_{\text{AX}'} = 11$  Hz,  $^3J_{\text{AA}'} = 3$  Hz,  $^1J_{\text{XX}'} = 348$  Hz;  $^1\text{H}$ :  $\delta$  1.94 (s, 30H, (CH<sub>3</sub>)<sub>5</sub>C<sub>5</sub>), 1.83 (d,  $^3J_{\text{PH}} = 14.3$  Hz, 18H, (CH<sub>3</sub>)<sub>3</sub>C), 1.04 (d,  $^3J_{\text{PH}} = 14.5$  Hz, 18H, (CH<sub>3</sub>)<sub>3</sub>C).

### 2.3 Reaction of [Cp\*W(CO)<sub>3</sub>]Li with *t*-Bu<sub>2</sub>P-PCl<sub>2</sub> (molar ratio 1:1). Synthesis of [Cp\*W(CO)<sub>3</sub>{η<sup>2</sup>-*t*-Bu<sub>2</sub>P-P(Cl)}] (**1-W**).

10 mL of solution of [Cp\*W(CO)<sub>3</sub>]Li (c= 0,1 M; 1 mmol) in THF was added dropwise to 10 mL of solution of *t*-Bu<sub>2</sub>P-PCl<sub>2</sub> (c= 0,1 M, 1 mmol) in pentane at -70 °C. During the reaction, the color of the solution changed from dark brown to red. The solution was then warmed up to room temperature. The volume was reduced to one half under reduced pressure and the resulting solution was analyzed by  $^{31}\text{P}\{^1\text{H}\}$ ,  $^{31}\text{P}$ , and  $^1\text{H}$  NMR. The complex **3** was identified in solution as transient specie. The solvent was then evaporated under reduced pressure and the residue extracted with 10 mL of pentane. The extract was filtrated, reduced to one half under reduced pressure. Then the solution was held at -30 °C and small amount of orange crystals of **2-W** deposited within few days. Results of the examination of the  $^{31}\text{P}\{^1\text{H}\}$ -NMR of the reaction mixture: **1-W**, *t*-Bu<sub>2</sub>PH, *t*-Bu<sub>2</sub>PCl.

**1-W**:  $^{31}\text{P}\{^1\text{H}\}$ :  $\delta$  151.8 (d,  $^1J_{\text{PP}} = 447$  Hz, PCl); 63.8 (d,  $^1J_{\text{PP}} = 447$  Hz, *t*-Bu<sub>2</sub>P);

### 2.4 Reaction of [Cp\*W(CO)<sub>3</sub>]Li with *t*-Bu<sub>2</sub>P-PCl<sub>2</sub> (molar ratio 2:1). Synthesis of [Cp\*W(CO)<sub>3</sub>{η<sup>2</sup>-*t*-Bu<sub>2</sub>P-P}]<sub>2</sub> **2-W**.

20 mL of solution of [Cp\*W(CO)<sub>3</sub>]Li (c= 0,1 M; 2 mmol) in THF was added dropwise to 10 mL of solution of *t*-Bu<sub>2</sub>P-PCl<sub>2</sub> (c= 0,1 M, 1 mmol) in pentane at -70 °C. During the reaction, the color of the solution changed from dark brown to red. The solution was then warmed up to room temperature. The volume was reduced to one half under reduced pressure and the resulting solution was analyzed by  $^{31}\text{P}\{^1\text{H}\}$ ,  $^{31}\text{P}$ , and  $^1\text{H}$  NMR. The solvent was then evaporated under reduced pressure and the residue extracted with 10 mL of pentane. The extract was filtrated, reduced to one half under reduced pressure and stored at room temperature. The dark precipitate of **3-W** formed after few days. Then the solution was filtered and held at -30 °. Orange crystals of **2-W** deposited within 24 h (390 mg, yield 71%). Elemental analysis: found %, C = 42.81, H = 5.89, calc. % for C<sub>40</sub>H<sub>66</sub>O<sub>4</sub>P<sub>4</sub>W<sub>2</sub>, C = 43.58, H = 6.03.

**2-W**:  $^{31}\text{P}\{^1\text{H}\}$  (AA'XX' spin system):  $\delta$  47.8 (A, *t*-Bu<sub>2</sub>P); -171.9 (X, P);  $^1J_{\text{AX}} = 524$ ,  $^2J_{\text{AX}'} = 9$  Hz,  $^3J_{\text{AA}'} = 3$  Hz,  $^1J_{\text{XX}'} = 350$  Hz;  $^1\text{H}$ :  $\delta$  2.00 (s, 30H, (CH<sub>3</sub>)<sub>5</sub>C<sub>5</sub>), 1.87 (d,  $^3J_{\text{PH}} = 15.5$  Hz, 18H, (CH<sub>3</sub>)<sub>3</sub>C), 1.07 (d,  $^3J_{\text{PH}} = 14.7$  Hz, 18H, (CH<sub>3</sub>)<sub>3</sub>C).

### 3. Crystallographic details

The diffraction data were collected with a KM4CCD kappa geometry diffractometer with graphite monochromated Mo  $K\alpha$  radiation (0.71073 Å) equipped with a Sapphire2 CCD detector (**2-W**) and a Sapphire3 CCD detector (**2-Mo**). The diffraction data for **3-Mo** was collected on a STOE IPDS II diffractometer with graphite monochromated Mo  $K\alpha$  radiation (0.71073 Å). All measurements were carried out at low temperature (150K). Structures were solved by direct methods and refined against  $F^2$  by least square techniques using the SHELXS and SHELXL software.<sup>3</sup> Refinement was performed with anisotropic temperature factors for all non-hydrogen atoms (disordered atoms were refined isotropically – **2-Mo**). Examination of the structure (**2-W**) with *PLATON*<sup>4</sup> showed that it contains large region between the molecules; these are occupied by pentane solvent molecule (0.5 molecule), but disorder is so extensive that an atomic model could not be developed. The solvent contribution was modeled by the *SQUEEZE* procedure of *PLATON*, from which an estimate of the solvent content was obtained on the basis of the volume of the voids and the approximate number of electrons in them. All hydrogen atoms were calculated on idealized positions.

CCDC numbers 1440633-1440635 contain the supplementary crystallographic data for this paper. These data can be obtained free of charge from the Cambridge Crystallographic Data Centre via [www.ccdc.cam.ac.uk/data\\_request/cif](http://www.ccdc.cam.ac.uk/data_request/cif).

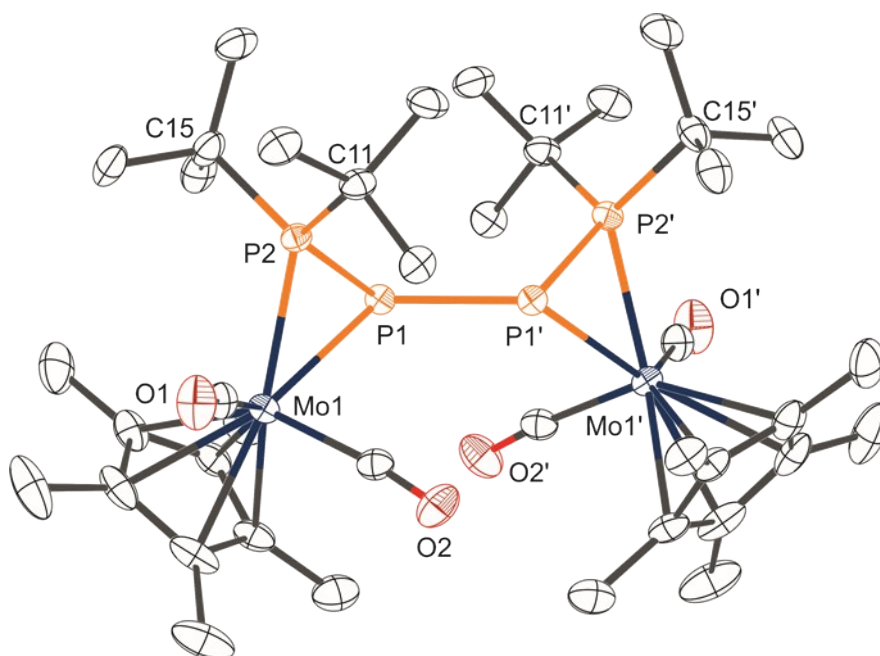

**Figure S1** X-ray structure of the **2-Mo** showing the atom-numbering scheme. Ellipsoids drawn at the 50% probability level; H atoms have been omitted for clarity. Important bond lengths (Å) and bond angles (deg.): Mo1-P1 2.5731(6), Mo1-P2 2.4450(6), P1-P2 2.1414(9), P1-P1 2.2413(12), Mo1-P1-P2 61.67(2), Mo1-P1-P1 108.04(4), P1-P1-P2 117.03(3), P1-P2-C15 119.94(8), P1-P2-C11 111.06(8), C11-P2-C15 109.95(11),  $\Sigma$ P1 = 286.74,  $\Sigma$ P2 = 340.94,

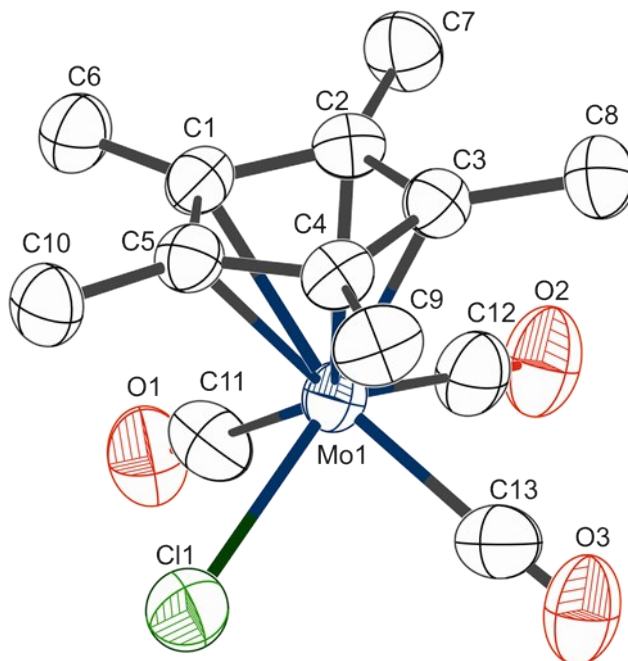

**Figure S2** X-ray structure of the **3-Mo** showing the atom-numbering scheme. Ellipsoids drawn at the 50% probability level; H atoms have been omitted for clarity. Important bond lengths (Å) and bond angles (deg.): Mo1-C1 2.368(4); Mo1-C2 2.316(4); Mo1-C3 2.299(4); Mo1-C4 2.325(4); Mo1-C5 2.382(4); Mo1-C11 2.068(6); Mo1-C12 2.025(6); Mo1-C13 2.073(7); Mo1-C11 2.5134(15); C1-Mo1-C11 89.37(19); C11-Mo1-C12 77.47(19); C11 Mo1 C11 79.71(14).

#### 4. DFT calculation details

All calculations were performed using the Amsterdam Density Functional (ADF) package (version 2014.06).<sup>3</sup> DFT calculations were carried out using the hybrid-GGA functional B3LYP.<sup>4</sup> Relativistic effects were included with the scalar zero-order regular approximation (ZORA) model.<sup>5</sup> All atoms were described by a Slater-type triple- $\zeta$  quality basis set for all atoms with two polarization functions, corresponding to basis set TZ2P in the ADF package.<sup>6</sup> Starting geometries of **2-Mo** and  $[\text{Cp}^*\text{Mo}(\text{CO})_3(\text{P}(\text{Cl})\text{Ni-Pr}_2)]$ <sup>7</sup> were taken from the experimental crystallographic data. Geometries for **1-Mo** and **4-Mo** were taken from corresponding parts of **2-Mo** and optimized using mentioned method.

**Table S1** Calculated Hirshfeld charges for complexes **1-Mo**, **2-Mo**, **4-Mo** and  $[\text{Cp}^*\text{Mo}(\text{CO})_3(\text{P}(\text{Cl})\text{Ni-Pr}_2)]$ .<sup>7</sup>

| Complex                                                                  | Mo    | P1     | P2    | N      | Cl     |
|--------------------------------------------------------------------------|-------|--------|-------|--------|--------|
| $[\text{Cp}^*\text{Mo}(\text{CO})_3(\text{P}(\text{Cl})\text{Ni-Pr}_2)]$ | 0.325 | 0.159  |       | -0.121 | -0.163 |
| <b>1-Mo</b>                                                              | 0.282 | 0.015  | 0.171 |        | -0.146 |
| <b>2-Mo</b>                                                              | 0.288 | -0.025 | 0.186 |        |        |
| <b>4-Mo</b>                                                              | 0.300 | -0.121 | 0.166 |        |        |

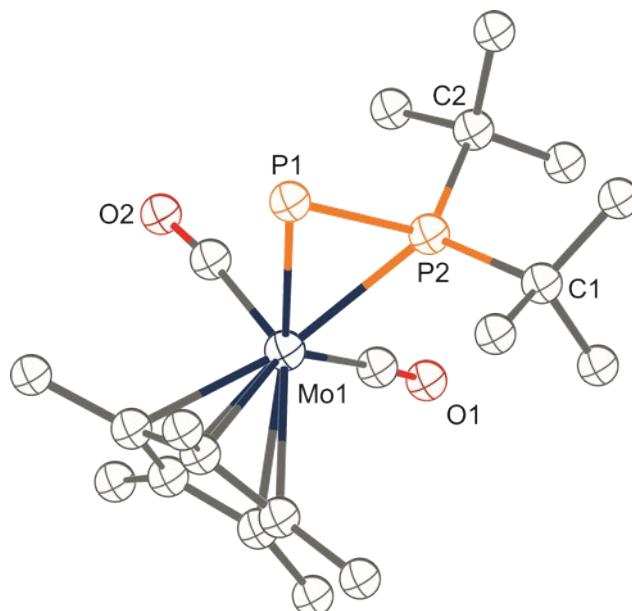

**Figure S3** DFT optimized structure for **4-Mo**. Important bond lengths (Å) and bond angles (deg.): P1-P2 2.103; P1-Mo1 2.515; P2-Mo1 2.528; P2-C1 1.929; P2-C2 1.924; P2-P1-C1-P2-P1 114.26; C2-P2-P1 116.14; C1-P2-C2 110.64

**Table S2** Cartesian coordinates of the optimized structure **1-Mo**.

|   |             |             |            |
|---|-------------|-------------|------------|
| C | -5.90900959 | 12.19885052 | 1.32764884 |
| H | -6.64191853 | 11.52928801 | 1.78851084 |
| H | -4.92664734 | 11.74566678 | 1.45479630 |
| H | -6.12191621 | 12.23152423 | 0.26067731 |
| C | -4.54334055 | 13.00992754 | 4.04798712 |
| H | -3.98120422 | 13.54631919 | 4.80960328 |
| H | -3.84283732 | 12.39646676 | 3.48221897 |
| H | -5.22119319 | 12.32652233 | 4.57009056 |
| C | -5.48994941 | 15.95440919 | 4.80903366 |
| H | -6.13792827 | 15.58643091 | 5.61042348 |
| H | -5.65342237 | 17.02660684 | 4.71838677 |
| H | -4.45725512 | 15.80898808 | 5.12436056 |
| C | -7.60021934 | 16.89457738 | 2.62350625 |
| H | -7.94260518 | 17.21240374 | 1.64024149 |
| H | -7.06574408 | 17.73211095 | 3.06916669 |
| H | -8.48608583 | 16.70186385 | 3.23621794 |
| C | -7.88946114 | 14.54674686 | 0.47222194 |

|   |             |             |             |
|---|-------------|-------------|-------------|
| H | -7.54795918 | 13.92621480 | -0.35541687 |
| H | -8.11720064 | 15.53280324 | 0.07052660  |
| H | -8.82533408 | 14.11655436 | 0.84206313  |
| C | -4.26218793 | 14.51384204 | -0.33639973 |
| O | -4.05510783 | 13.92058020 | -1.30630254 |
| C | -5.98202909 | 13.55977261 | 1.95861411  |
| C | -5.33316465 | 13.93858031 | 3.17292200  |
| C | -5.79417512 | 15.23891292 | 3.52810747  |
| C | -6.74101832 | 15.66501439 | 2.54046972  |
| C | -6.87068741 | 14.61391237 | 1.57431863  |
| C | -0.95709254 | 14.90540076 | 2.09319688  |
| C | -1.41274848 | 14.84335844 | 3.55692418  |
| H | -0.78553832 | 14.12370738 | 4.09066505  |
| H | -2.44498865 | 14.51564095 | 3.64412866  |
| H | -1.31777664 | 15.81013610 | 4.04949151  |
| C | -0.98808531 | 13.48420434 | 1.50202468  |
| H | -0.64476189 | 13.45279612 | 0.46931789  |
| H | -1.99433377 | 13.06575166 | 1.53338225  |
| H | -0.33293193 | 12.83498280 | 2.08985905  |
| C | 0.47709147  | 15.45438237 | 2.08110090  |
| H | 0.52561540  | 16.46377048 | 2.48874912  |
| H | 0.92825065  | 15.45532621 | 1.09213140  |
| H | 1.09596934  | 14.81315932 | 2.71632552  |
| C | -1.44574482 | 16.73201269 | -0.45338471 |
| C | -0.75525773 | 15.62275036 | -1.26893775 |
| H | -1.44881895 | 14.82996807 | -1.54837092 |
| H | 0.09224883  | 15.17789928 | -0.75235766 |
| H | -0.37381623 | 16.06632278 | -2.19273113 |
| C | -0.43526588 | 17.83389479 | -0.08222933 |
| H | 0.40983433  | 17.46079716 | 0.48816335  |
| H | -0.91043203 | 18.63454673 | 0.48135972  |
| H | -0.04157092 | 18.26480814 | -1.00727874 |

|    |             |             |             |
|----|-------------|-------------|-------------|
| C  | -2.53258586 | 17.36126129 | -1.33792985 |
| H  | -2.03664449 | 17.79991509 | -2.20842373 |
| H  | -3.07177741 | 18.15520208 | -0.82933725 |
| H  | -3.24592238 | 16.62674091 | -1.70294008 |
| C  | -5.37420985 | 16.88802893 | 0.10735122  |
| O  | -5.88830889 | 17.66076310 | -0.57994882 |
| P  | -3.32249708 | 17.27840106 | 2.45449530  |
| P  | -2.25017997 | 15.96707777 | 1.12484067  |
| Mo | -4.71045033 | 15.50606007 | 1.32738035  |
| Cl | -3.38292382 | 19.28381777 | 1.64292476  |

**Table S3** Cartesian coordinates of the optimized structure **4-Mo**.

|   |             |             |             |
|---|-------------|-------------|-------------|
| C | -6.06255400 | 12.21713200 | 1.43075600  |
| H | -6.75291700 | 11.58851900 | 2.00162400  |
| H | -5.07879300 | 11.75248200 | 1.48238700  |
| H | -6.38354800 | 12.19495200 | 0.39059400  |
| C | -4.50762800 | 13.11260300 | 4.00573800  |
| H | -3.89780100 | 13.65953500 | 4.72158000  |
| H | -3.84548600 | 12.46935600 | 3.42603600  |
| H | -5.16969500 | 12.45701000 | 4.58130100  |
| C | -5.31469000 | 16.14477000 | 4.66203100  |
| H | -6.01235600 | 15.94065300 | 5.48055200  |
| H | -5.32470000 | 17.21737100 | 4.47731100  |
| H | -4.31504100 | 15.88405500 | 5.00627200  |
| C | -7.48526100 | 17.04899400 | 2.53469900  |
| H | -7.84774700 | 17.34135900 | 1.55039300  |
| H | -6.89579900 | 17.87695900 | 2.92673800  |
| H | -8.35723300 | 16.92752000 | 3.18500600  |
| C | -7.99313000 | 14.59944300 | 0.54403800  |
| H | -7.73087200 | 13.91058900 | -0.25806400 |
| H | -8.19129300 | 15.56912300 | 0.09022700  |
| H | -8.92840700 | 14.24709600 | 0.99019600  |



|   |             |             |             |
|---|-------------|-------------|-------------|
| C | -4.16500000 | 14.23108700 | -0.27983500 |
| O | -3.89238500 | 13.48627700 | -1.12042800 |
| C | -6.05372900 | 13.61256200 | 1.98562100  |
| C | -5.32012600 | 14.02979500 | 3.13865000  |
| C | -5.70761500 | 15.36825000 | 3.44140600  |
| C | -6.68670900 | 15.77856500 | 2.47934800  |
| C | -6.91289400 | 14.67887000 | 1.58452000  |
| C | -0.97746600 | 15.06901600 | 2.07527500  |
| C | -1.46775800 | 15.18039200 | 3.52409900  |
| H | -0.82977000 | 14.56263400 | 4.16281800  |
| H | -2.49130200 | 14.83219200 | 3.62908100  |
| H | -1.42390600 | 16.20840400 | 3.88341400  |
| C | -0.95973800 | 13.58694800 | 1.66090800  |
| H | -0.59717700 | 13.44302300 | 0.64401400  |
| H | -1.95461800 | 13.14615500 | 1.72636600  |
| H | -0.29821000 | 13.03001200 | 2.33121200  |
| C | 0.44578900  | 15.64560100 | 2.02339100  |
| H | 0.46585200  | 16.69718000 | 2.30986600  |
| H | 0.91455400  | 15.54054600 | 1.04766000  |
| H | 1.06707800  | 15.09786500 | 2.73902300  |
| C | -1.44992000 | 16.56158900 | -0.68037100 |
| C | -0.72587400 | 15.39609200 | -1.37662200 |
| H | -1.39947600 | 14.56391400 | -1.58054100 |
| H | 0.12175600  | 15.02235700 | -0.80520100 |
| H | -0.33696200 | 15.74857200 | -2.33650100 |
| C | -0.47707100 | 17.72850600 | -0.42312500 |
| H | 0.38383600  | 17.44360100 | 0.17485100  |
| H | -0.98293000 | 18.55617000 | 0.07467600  |
| H | -0.10365400 | 18.09223600 | -1.38497300 |
| C | -2.54830900 | 17.07927200 | -1.61948200 |
| H | -2.06961800 | 17.45339800 | -2.52885800 |
| H | -3.10841100 | 17.90045600 | -1.17528100 |

|    |             |             |             |
|----|-------------|-------------|-------------|
| H  | -3.24845000 | 16.29912200 | -1.90946100 |
| C  | -5.42320300 | 16.65360000 | -0.20106800 |
| O  | -5.95887000 | 17.33039300 | -0.97121500 |
| P  | -3.41070300 | 17.47284900 | 1.92299000  |
| P  | -2.26099000 | 15.99225800 | 0.96933600  |
| Mo | -4.72246100 | 15.45743700 | 1.18563200  |

## 5. References

- [1] (a) W. E. Lindsell, K. J. McCullough, S. Plancq, *Journal of Organometallic Chemistry*, 1995, **491**, 275-281; (b) S. F. Amevor, H.-U. Hund, A. Salzer, *Journal of Organometallic Chemistry*, 1996, **520**, 79-84
- [2] G. Fritz, T. Vaahs, J. Härer, *Z. Anorg. Allg. Chem.*, 1987, **552**, 11-17;
- [3] G. M. Sheldrick, *Acta Crystallogr. Sect. A*, 2008, **64**, 112-122; [4] A. L. Spek, *PLATON*. University of Utrecht, The Netherlands, **2001**.
- [5] (a) G. te Velde, F.M. Bickelhaupt, S.J.A. van Gisbergen, C. Fonseca Guerra, E.J. Baerends, J.G. Snijders and T. Ziegler, *Journal of Computational Chemistry*, 2001, **22**, 931-937; (b) C. Fonseca Guerra, J.G. Snijders, G. te Velde and E.J. Baerends, *Theoretical Chemistry Accounts*, 1998, **99**, 391-403; (c) ADF2014, SCM, Theoretical Chemistry, Vrije Universiteit, Amsterdam, The Netherlands, <http://www.scm.com>
- [6] (a) A. D. Becke, *Phys. Rev. A: At., Mol., Opt. Phys.*, 1988, **38**, 3098-3100; (b) C. Lee, W. Yang and R. G. Parr, *Phys. Rev. B: Condens. Matter Mater. Phys.*, 1988, **37**, 785-789; (c) A. D. Becke, *J. Chem. Phys.*, 1993, **98**, 1372-1377; (d) A. D. Becke, *J. Chem. Phys.*, 1993, **98**, 5648-5652.
- [7] (a) E. van Lenthe, E.J. Baerends and J.G. Snijders, *Journal of Chemical Physics*, 1993, **99**, 4597; (b) E. van Lenthe, E.J. Baerends and J.G. Snijders, *Journal of Chemical Physics*, 1994, **101**, 9783-; (c) E. van Lenthe, A.E. Ehlers and E.J. Baerends, *Journal of Chemical Physics*, 1999, **110**, 8943;
- [8] E. van Lenthe and E.J. Baerends, *Journal of Computational Chemistry*, 2003, **24**, 1142-1156
- [9] B. T. Sterenberg, A. J. Carty, *J. Organomet. Chem.*, 2001, **617-618**, 696-701.
